# Supplementary material for: Physiotherapy versus Consecutive Physiotherapy and Cognitive Treatment in People with Parkinson’s Disease: A Pilot Randomized Cross-Over Study
Source: MDPI journal article supplement (doi:10.3390/jpm11080687), 2021-07-21
Supplement: s1 [file s1]

## The TIDieR (Template for Intervention Description and Replication) Checklist:

| Item<br>number | Item                                                                                                                                                                                                                                                                                                                | Where located                                 |                              |
|----------------|---------------------------------------------------------------------------------------------------------------------------------------------------------------------------------------------------------------------------------------------------------------------------------------------------------------------|-----------------------------------------------|------------------------------|
|                |                                                                                                                                                                                                                                                                                                                     | Primary paper<br>(page or appendix<br>number) | Other <sup>†</sup> (details) |
| 1.             | <b>BRIEF NAME</b><br>Provide the name or a phrase that describes the intervention.                                                                                                                                                                                                                                  | Page 3                                        | _____                        |
| 2.             | <b>WHY</b><br>Describe any rationale, theory, or goal of the elements essential to the intervention.                                                                                                                                                                                                                | Page 3                                        | _____                        |
| 3.             | <b>WHAT</b><br>Materials: Describe any physical or informational materials used in the intervention, including those provided to participants or used in intervention delivery or in training of intervention providers.<br>Provide information on where the materials can be accessed (e.g. online appendix, URL). | Page 3                                        | _____                        |
| 4.             | <b>WHO PROVIDED</b><br>Procedures: Describe each of the procedures, activities, and/or processes used in the intervention, including any enabling or support activities.                                                                                                                                            | Page 3                                        | _____                        |
| 5.             | For each category of intervention provider (e.g. psychologist, nursing assistant), describe their expertise, background and any specific training given.                                                                                                                                                            | Page 3                                        | _____                        |
| 6.             | <b>HOW</b><br>Describe the modes of delivery (e.g. face-to-face or by some other mechanism, such as internet or telephone) of the intervention and whether it was provided individually or in a group.                                                                                                              | Page 3                                        | _____                        |
| 7.             | <b>WHERE</b><br>Describe the type(s) of location(s) where the intervention occurred, including any necessary infrastructure or relevant features.                                                                                                                                                                   | Page 3                                        | _____                        |

|                          |                                                                                                                                                                                   |        |  |
|--------------------------|-----------------------------------------------------------------------------------------------------------------------------------------------------------------------------------|--------|--|
| <b>WHEN and HOW MUCH</b> |                                                                                                                                                                                   |        |  |
| 8.                       | Describe the number of times the intervention was delivered and over what period of time including the number of sessions, their schedule, and their duration, intensity or dose. | Page 3 |  |
| <b>TAILORING</b>         |                                                                                                                                                                                   |        |  |
| 9.                       | If the intervention was planned to be personalised, titrated or adapted, then describe what, why, when, and how.                                                                  | N/A    |  |
| <b>MODIFICATIONS</b>     |                                                                                                                                                                                   |        |  |
| 10.                      | If the intervention was modified during the course of the study, describe the changes (what, why, when, and how).                                                                 | N/A    |  |
| <b>HOW WELL</b>          |                                                                                                                                                                                   |        |  |
| 11.                      | Planned: If intervention adherence or fidelity was assessed, describe how and by whom, and if any strategies were used to maintain or improve fidelity, describe them.            | N/A    |  |
| 12.                      | Actual: If intervention adherence or fidelity was assessed, describe the extent to which the intervention was delivered as planned.                                               | N/A    |  |

N/A: item is not applicable for the intervention

† If the information is not provided in the primary paper, give details of where this information is available. This may include locations such as a published protocol or other published papers (provide citation details) or a website (provide the URL).
